# Supplementary material
Source: PubMed Central journal article supplement (PMC10230515)
Supplement: NIHMS1787926-supplement-1.pdf [file NIHMS1787926-supplement-1.pdf]

Table S1. gDNA and cDNA library concentrations by sample type.

| Sample type | gDNA concentration (ng/ $\mu$ L) | Bacterial cDNA (ng/ $\mu$ L) | Fungal cDNA (ng/ $\mu$ L) |
|-------------|----------------------------------|------------------------------|---------------------------|
| OC-Sa1      | 23.35                            | 35.35                        | 11.70                     |
| OUT-Sa1     | 15.85                            | 35.16                        | 31.21                     |
| OC-Sa2      | 20.05                            | 25.12                        | 16.66                     |
| OUT-Sa2     | 24.49                            | 44.81                        | 10.99                     |
| OC-Sb1      | 21.7                             | 19.54                        | 21.16                     |
| OUT-Sb1     | 21.9                             | 24.55                        | 29.62                     |
| OC-Sb2      | 19.75                            | 18.81                        | 16.36                     |
| OUT-Sb2     | 24.05                            | 27.08                        | 33.08                     |
| OC-Sb3      | 26.15                            | 14.23                        | 21.08                     |
| OUT-Sb3     | 27.55                            | 38.06                        | 10.19                     |
| UOC-Sb4     | 34.15                            | 3.20                         | 18.80                     |
| OUT-Sb4     | 22.90                            | 16.43                        | 12.63                     |
| OC-Sc1      | 30.30                            | 12.10                        | 22.43                     |
| OUT-Sc1     | 33.25                            | 29.96                        | 29.09                     |
| OC-Sc2      | 24.80                            | 11.45                        | 26.81                     |
| OUT-Sc2     | 24.65                            | 8.29                         | 10.52                     |
| UOC-Sc3     | 24.20                            | 37.23                        | 14.12                     |
| OUT-Sc3     | 25.75                            | 15.41                        | 17.93                     |

\* Only samples with cDNA concentration greater than 10 ng/ $\mu$ L were sequenced.

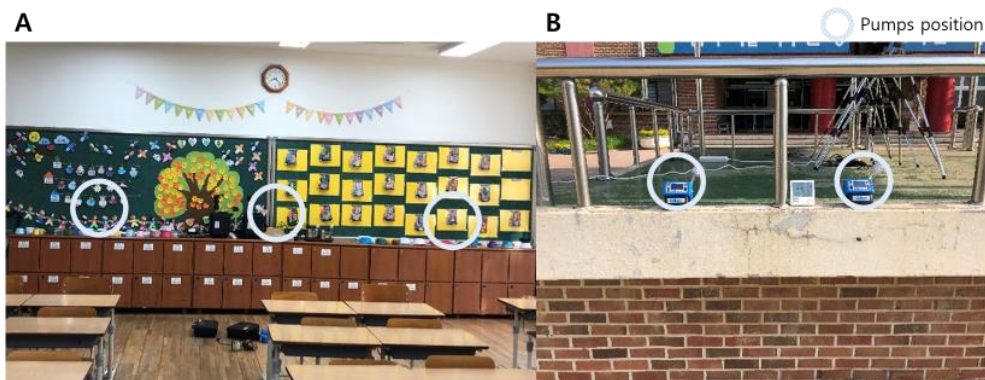

Figure S1. Lee et al.

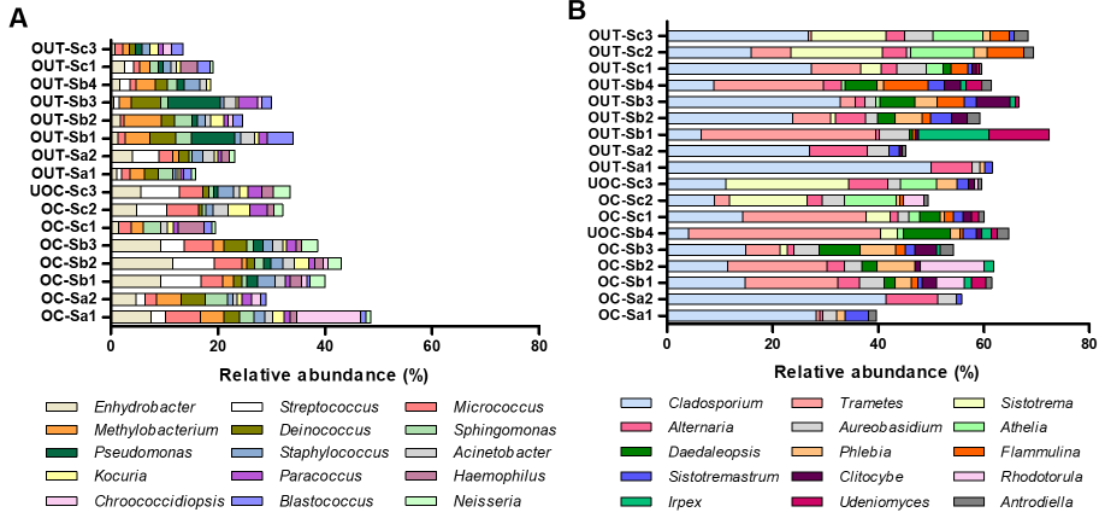

Figure S2. Lee et al.

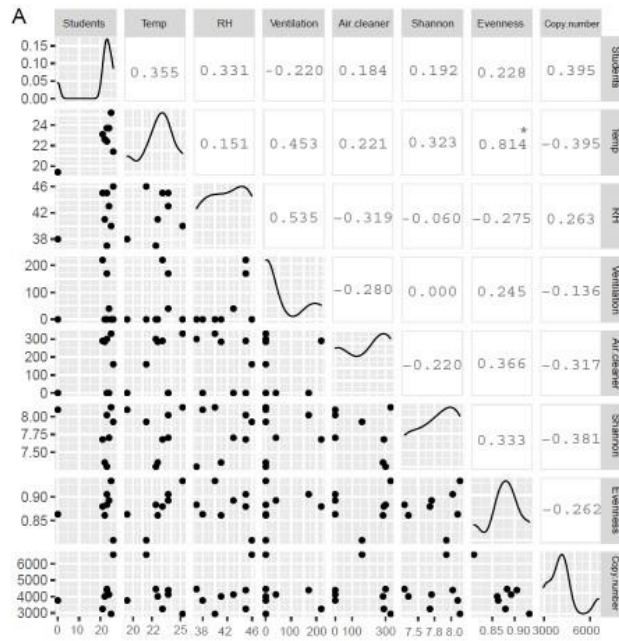

Figure S3A. Lee et al.

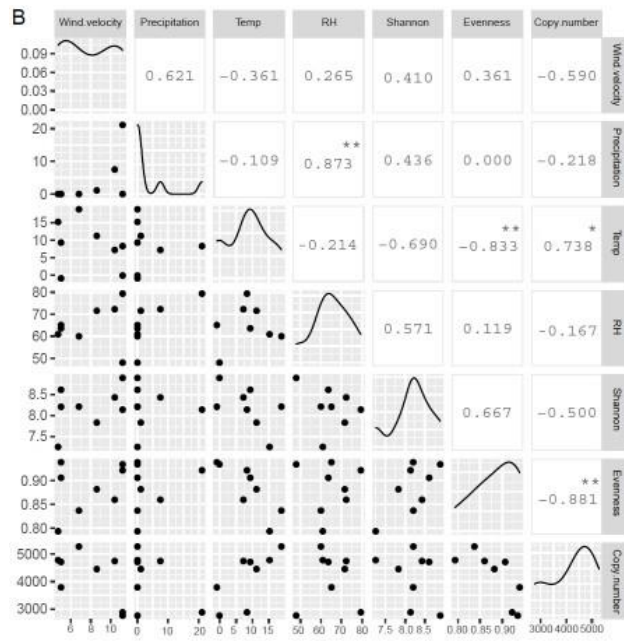

Figure S3B. Lee et al.

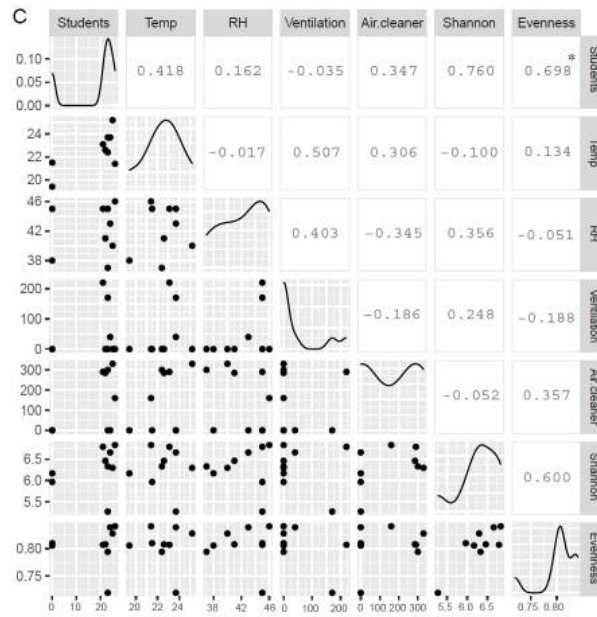

Figure S3C. Lee et al.

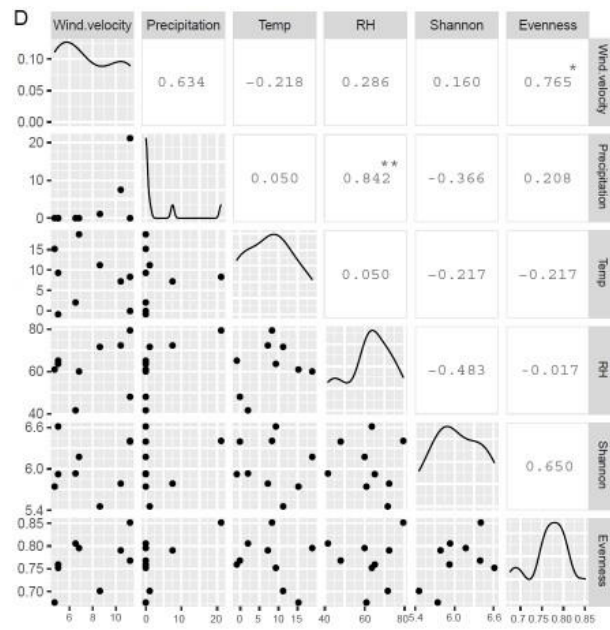

Figure S3D. Lee et al.
